# Supplementary material for: Tartrate-stabilized titanium–oxo clusters containing sulfonate chromophore ligands: synthesis, crystal structures and photochemical properties
Source: Royal Society of Chemistry journal article supplement (doi:10.1039/d1nj01540k), 2021-01-01
Supplement: d1nj01540k1.pdf [file d1nj01540k1.pdf]

## Supplementary Information for

# Tartrate-stabilized titanium-oxo clusters containing sulfonate chromophore ligands: Synthesis, crystal structures and photochemical properties

Wen-Yu Mou,<sup>ab</sup> Bin Xie,<sup>\*ac</sup> Xiao-Long Li,<sup>a</sup> Chuan Lai,<sup>\*de</sup> Tao Li,<sup>f</sup> Luo Chen,<sup>a</sup> Jian-Shen Feng,<sup>b</sup> Xiao-Xue Bai,<sup>a</sup> Yu Wu,<sup>b</sup> Wei-Ping Wu,<sup>b</sup> Dong-Liang Zhang,<sup>f</sup> and Yun-Tian Gu<sup>a</sup>

<sup>a</sup> School of Materials Science and Engineering, Key Laboratory of Materials Corrosion and Protection of Sichuan Province, Sichuan University of Science and Engineering, Zigong 643000, P. R. China

<sup>b</sup> College of Chemistry and Environmental Engineering, Sichuan University of Science and Engineering, Zigong 643000, P. R. China

<sup>c</sup> Sichuan Province Key Laboratory of Comprehensive Utilization of Vanadium and Titanium Resources, Panzhihua University, Panzhihua 617000, China

<sup>d</sup> School of Chemistry and Chemical Engineering, Sichuan University of Arts and Science, Dazhou 635000, P. R. China

<sup>e</sup> Sichuan Sizhong Basalt Fiber Technology Research and Development Co., Ltd, Dazhou 635000, P. R. China

<sup>f</sup> School of Chemical Engineering, Sichuan University of Science and Engineering, Zigong 643000, P. R. China

### \*Corresponding author

Bin Xie, School of Materials Science and Engineering, Key Laboratory of Materials Corrosion and Protection of Sichuan Province, Sichuan University of Science and Engineering, Zigong 643000, China.

Chuan Lai, School of Chemistry and Chemical Engineering, Sichuan University of Arts and Science, Dazhou 635000, China.

*E-mail address:* [xiebin@suse.edu.cn](mailto:xiebin@suse.edu.cn) (B. Xie); [20150002@sasu.edu.cn](mailto:20150002@sasu.edu.cn) (C. Lai)

## CONTENTS

**Table S1** Geometrical parameter of **1** and **2**: Internal coordinates at DFT/B3LYP method with 6-311G\* and LANL2DZ basis set.

**Table S2** Bond lengths(Å) for complex **1**.

**Table S3** Bond angles (°) for complex **1**.

**Table S4** Bond lengths (Å) for complex **2**.

**Table S5** Bond angles (°) for complex **2**.

**Figure S1** Photo of the crystals **1** (a) and **2** (b).

**Figure S2** Comparison of experimental and computed FT-IR spectra of **1** and **2**.

**Figure S3** TGA curves of **1** and **2**. All the two samples were treated by vacuum drying.

**Figure S4** Mott-Schottky plots for **1** and **2** in 0.1 M Na<sub>2</sub>SO<sub>4</sub> aqueous solution.

**Figure S5** Full range J-V curves of **1** and **2** in light-off (black) and light-on (red) conditions.

**Figure S6** XRD patterns of **1** and **2** under solvothermal treatment at room temperature for 24 h in different organic solvents.

**Figure S7** (a) The hydrogen bonds between adjacent TOCs of **1**; (b) The 3D supramolecular network of **1**. The most hydrogen atoms are omitted for clarity.

**Figure S8** (a) The hydrogen bonds between adjacent TOCs of **2**; (b) The 3D supramolecular network of **2** viewing along *a*-axis. The most hydrogen atoms are omitted for clarity.

**Table S1** Geometrical parameter of **1** and **2**: Internal coordinates at DFT/B3LYP method with 6-311G\* and LANL2DZ basis set.

| <b>1</b> |             |             |             |
|----------|-------------|-------------|-------------|
| Ti       | -2.47259179 | 1.05778797  | 1.70748006  |
| Ti       | -2.97394888 | 1.26918024  | -1.46357550 |
| S        | -3.13418241 | -1.77612933 | -0.12147738 |
| O        | -1.35724250 | 0.49405939  | -2.51071701 |
| O        | -1.52806234 | 0.95595958  | -0.04498077 |
| O        | 0.72785215  | -0.27297759 | -2.46209409 |
| O        | -2.88977625 | -1.10857170 | 1.19717774  |
| O        | -3.85930627 | 1.46605199  | 0.34316446  |
| O        | -3.48117673 | -0.77169970 | -1.19096136 |
| O        | -1.97433199 | 2.72409205  | 2.11694407  |
| O        | -2.03551685 | -2.66542858 | -0.54414468 |
| O        | -4.18202873 | 1.40098527  | -2.77237834 |
| O        | -3.42776256 | 0.67969149  | 3.16456679  |
| O        | -2.39238474 | 2.95788929  | -1.64901970 |
| N        | -4.16340008 | -3.98376612 | -1.98025246 |
| H        | -4.35725589 | -4.83417797 | -2.48289252 |
| H        | -3.18701257 | -3.72628738 | -1.93726933 |
| C        | -0.28263575 | 0.23003909  | -1.90548377 |
| C        | -4.59200599 | -2.76353623 | 0.09483143  |
| C        | -4.93014917 | -3.74158044 | -0.86699276 |
| C        | -0.24437374 | 0.58805737  | -0.42460163 |
| H        | 0.44229897  | 1.42813181  | -0.29828578 |
| C        | -6.93976697 | -4.18233608 | 0.43811683  |
| H        | -7.85917455 | -4.74535205 | 0.56158094  |
| C        | -5.40088625 | -2.51309179 | 1.20159260  |
| H        | -5.08119957 | -1.76243605 | 1.91219822  |
| C        | -6.13504417 | -4.44060442 | -0.65860542 |
| H        | -6.42843850 | -5.19665373 | -1.38091754 |
| C        | -6.58016362 | -3.21949303 | 1.38419132  |
| H        | -7.20706631 | -3.02650016 | 2.24655613  |
| C        | -5.20431074 | 1.90301661  | 0.64164064  |
| H        | -5.31482483 | 1.79054610  | 1.72423743  |
| C        | -6.20916639 | 1.00459600  | -0.06355346 |
| H        | -6.09067181 | 1.06165560  | -1.14652150 |
| H        | -7.22738994 | 1.31165141  | 0.19222556  |
| H        | -6.07912553 | -0.03595590 | 0.23373598  |
| C        | -1.57174245 | 3.47584165  | 3.25225298  |
| H        | -2.01900101 | 3.00248706  | 4.13672931  |
| C        | -1.37351937 | 3.80765839  | -1.13022826 |
| H        | -1.03341392 | 3.37613381  | -0.18458770 |

|    |             |             |             |
|----|-------------|-------------|-------------|
| C  | -4.42560275 | 2.18382610  | -3.92944056 |
| H  | -3.94998048 | 3.15912903  | -3.75537698 |
| C  | -0.05098568 | 3.42574412  | 3.35868791  |
| H  | 0.29141369  | 2.39899306  | 3.48642610  |
| H  | 0.29196413  | 4.01829007  | 4.21243581  |
| H  | 0.40342565  | 3.81905682  | 2.44632573  |
| C  | -0.21509623 | 3.86623044  | -2.11991315 |
| H  | 0.18707055  | 2.87445637  | -2.32640064 |
| H  | 0.59757886  | 4.47224799  | -1.71228023 |
| H  | -0.54366737 | 4.30223656  | -3.06728109 |
| C  | -3.76528309 | 1.50314419  | -5.12283832 |
| H  | -2.69940408 | 1.36205143  | -4.93512882 |
| H  | -3.88653319 | 2.10609580  | -6.02747354 |
| H  | -4.21356852 | 0.52103529  | -5.29358270 |
| C  | -3.89210370 | -0.15988270 | 4.20309358  |
| H  | -4.85233792 | -0.57754705 | 3.86971710  |
| C  | -5.92903594 | 2.36109134  | -4.09519780 |
| H  | -6.41344384 | 1.38960357  | -4.22261562 |
| H  | -6.15004856 | 2.97724763  | -4.97117228 |
| H  | -6.36044796 | 2.84695696  | -3.21715474 |
| C  | -1.98065754 | 5.17786961  | -0.86355308 |
| H  | -2.36678840 | 5.61278628  | -1.78949550 |
| H  | -1.22722629 | 5.85478549  | -0.45087144 |
| H  | -2.80039017 | 5.09935766  | -0.14919033 |
| C  | -2.11540599 | 4.89085355  | 3.10425233  |
| H  | -1.69196528 | 5.36875794  | 2.21783674  |
| H  | -1.86192617 | 5.49549446  | 3.97955652  |
| H  | -3.20264957 | 4.87499809  | 2.99987000  |
| C  | -4.12681844 | 0.69212454  | 5.44573878  |
| H  | -3.18047195 | 1.11046217  | 5.79837165  |
| H  | -4.56165178 | 0.09348255  | 6.25092906  |
| H  | -4.80544544 | 1.51810992  | 5.22185334  |
| C  | -2.90141756 | -1.29589463 | 4.43743830  |
| H  | -2.77481944 | -1.88370634 | 3.52906930  |
| H  | -3.25644957 | -1.94983263 | 5.23894456  |
| H  | -1.92622973 | -0.89230488 | 4.71762671  |
| C  | -5.33687697 | 3.37293472  | 0.27400124  |
| H  | -4.58076865 | 3.96091083  | 0.79595324  |
| H  | -6.32555877 | 3.74892741  | 0.55163735  |
| H  | -5.20034149 | 3.51842753  | -0.79977598 |
| Ti | 2.47260272  | -1.05780059 | -1.70747934 |
| Ti | 2.97396229  | -1.26918250 | 1.46357689  |
| S  | 3.13413260  | 1.77613125  | 0.12147540  |
| O  | 1.35724138  | -0.49409576 | 2.51072051  |

|   |             |             |             |
|---|-------------|-------------|-------------|
| O | 1.52806897  | -0.95599501 | 0.04498272  |
| O | -0.72785620 | 0.27292993  | 2.46209564  |
| O | 2.88972876  | 1.10856559  | -1.19717592 |
| O | 3.85932607  | -1.46603372 | -0.34316270 |
| O | 3.48113804  | 0.77170986  | 1.19096336  |
| O | 1.97438003  | -2.72411503 | -2.11694651 |
| O | 2.03546327  | 2.66542553  | 0.54414220  |
| O | 4.18204222  | -1.40095795 | 2.77238272  |
| O | 3.42776227  | -0.67968241 | -3.16456773 |
| O | 2.39243442  | -2.95790411 | 1.64902775  |
| N | 4.16330954  | 3.98379400  | 1.98021896  |
| H | 4.35714663  | 4.83421511  | 2.48285053  |
| H | 3.18692662  | 3.72629936  | 1.93722749  |
| C | 0.28262814  | -0.23009891 | 1.90548900  |
| C | 4.59194778  | 2.76354763  | -0.09484315 |
| C | 4.93007404  | 3.74160575  | 0.86697075  |
| C | 0.24437714  | -0.58810428 | 0.42460324  |
| H | -0.44228961 | -1.42818207 | 0.29828214  |
| C | 6.93969389  | 4.18237028  | -0.43813187 |
| H | 7.85909555  | 4.74539562  | -0.56159741 |
| C | 5.40083587  | 2.51310019  | -1.20159801 |
| H | 5.08116113  | 1.76243314  | -1.91219698 |
| C | 6.13496198  | 4.44064183  | 0.65858296  |
| H | 6.42834288  | 5.19670306  | 1.38088807  |
| C | 6.58010647  | 3.21951273  | -1.38419794 |
| H | 7.20701582  | 3.02651782  | -2.24655742 |
| C | 5.20433604  | -1.90298210 | -0.64163938 |
| H | 5.31485483  | -1.79049409 | -1.72423393 |
| C | 6.20917925  | -1.00456374 | 0.06357505  |
| H | 6.09068017  | -1.06164364 | 1.14654155  |
| H | 7.22740698  | -1.31160472 | -0.19220460 |
| H | 6.07912966  | 0.03599206  | -0.23369667 |
| C | 1.57180275  | -3.47587054 | -3.25225585 |
| H | 2.01904826  | -3.00250349 | -4.13673214 |
| C | 1.37358524  | -3.80769531 | 1.13024023  |
| H | 1.03348472  | -3.37619341 | 0.18458767  |
| C | 4.42562579  | -2.18378506 | 3.92945226  |
| H | 3.95001987  | -3.15909715 | 3.75539536  |
| C | 0.05104470  | -3.42580474 | -3.35868603 |
| H | -0.29137723 | -2.39906033 | -3.48641729 |
| H | -0.29189477 | -4.01835356 | -4.21243614 |
| H | -0.40335461 | -3.81913198 | -2.44632421 |
| C | 0.21515211  | -3.86626011 | 2.11991360  |
| H | -0.18702778 | -2.87448608 | 2.32637590  |

|   |             |             |             |
|---|-------------|-------------|-------------|
| H | -0.59751145 | -4.47229555 | 1.71228411  |
| H | 0.54371751  | -4.30224305 | 3.06729422  |
| C | 3.76529218  | -1.50310391 | 5.12284271  |
| H | 2.69941153  | -1.36202931 | 4.93512906  |
| H | 3.88654925  | -2.10604638 | 6.02748307  |
| H | 4.21356182  | -0.52098664 | 5.29358048  |
| C | 3.89207984  | 0.15989876  | -4.20309949 |
| H | 4.85231285  | 0.57757497  | -3.86973440 |
| C | 5.92906139  | -2.36102478 | 4.09521437  |
| H | 6.41345352  | -1.38952814 | 4.22262456  |
| H | 6.15008190  | -2.97716972 | 4.97119485  |
| H | 6.36048293  | -2.84689143 | 3.21717653  |
| C | 1.98074137  | -5.17790564 | 0.86360117  |
| H | 2.36686664  | -5.61279808 | 1.78955734  |
| H | 1.22732202  | -5.85483878 | 0.45092609  |
| H | 2.80048106  | -5.09940050 | 0.14924601  |
| C | 2.11549629  | -4.89087172 | -3.10426309 |
| H | 1.69206929  | -5.36878831 | -2.21784767 |
| H | 1.86202519  | -5.49551452 | -3.97956852 |
| H | 3.20274000  | -4.87499439 | -2.99988560 |
| C | 4.12678999  | -0.69210401 | -5.44574868 |
| H | 3.18044441  | -1.11045327 | -5.79837017 |
| H | 4.56160558  | -0.09345555 | -6.25094372 |
| H | 4.80543034  | -1.51808094 | -5.22187262 |
| C | 2.90137634  | 1.29589832  | -4.43743024 |
| H | 2.77478195  | 1.88370716  | -3.52905883 |
| H | 3.25639016  | 1.94984185  | -5.23894002 |
| H | 1.92619026  | 0.89229636  | -4.71760701 |
| C | 5.33691443  | -3.37290438 | -0.27402177 |
| H | 4.58081402  | -3.96087920 | -0.79598646 |
| H | 6.32560100  | -3.74888344 | -0.55165932 |
| H | 5.20037532  | -3.51841502 | 0.79975258  |

---

**2**

---

|    |             |             |             |
|----|-------------|-------------|-------------|
| Ti | -3.01495769 | -1.12999910 | -1.35152900 |
| Ti | -2.56079618 | 1.89723482  | -0.31503240 |
| S  | -3.10695313 | -0.47370041 | 1.99600399  |
| O  | -1.55159123 | 0.20115272  | -0.92473217 |
| O  | 0.76850062  | -2.43644584 | -0.48874640 |
| O  | -1.31370045 | -2.28910858 | -1.23015978 |
| O  | -3.96163094 | 0.59637159  | -0.94932381 |
| O  | -2.86672996 | -1.41708276 | 0.85078900  |
| O  | -2.69817424 | 0.92546471  | 1.61003335  |
| O  | -2.06892323 | 2.74392115  | -1.81077651 |
| O  | -3.01815887 | -1.03102129 | -3.13919128 |

|   |             |             |             |
|---|-------------|-------------|-------------|
| O | -4.11634479 | -2.52753291 | -1.22619756 |
| O | -3.66435887 | 3.19735009  | 0.26128847  |
| O | -2.46720524 | -0.95076884 | 3.22775225  |
| C | -0.24953477 | -1.76745134 | -0.79936434 |
| C | -4.87451656 | -0.42295235 | 2.23714414  |
| C | -5.56091140 | 0.75237580  | 1.93495136  |
| H | -4.99181207 | 1.62583926  | 1.64064815  |
| C | -0.25470309 | -0.23947787 | -0.68682798 |
| H | 0.41878495  | 0.13099292  | -1.46457526 |
| C | -5.54429762 | -1.58800185 | 2.66279878  |
| N | -4.87828932 | -2.76317143 | 2.97292451  |
| H | -5.41885229 | -3.43593955 | 3.49424548  |
| H | -3.93479699 | -2.66093774 | 3.32235097  |
| C | -6.95051350 | 0.80506567  | 1.98743008  |
| C | -6.94801362 | -1.52362237 | 2.70028349  |
| H | -7.50481043 | -2.40498437 | 3.00640963  |
| C | -7.62623269 | -0.36177151 | 2.36554734  |
| H | -8.71208350 | -0.35946992 | 2.40749057  |
| C | -5.26487681 | 1.03567291  | -1.42748551 |
| H | -5.59717089 | 1.77921290  | -0.69895141 |
| C | -4.38209386 | -3.68363194 | -0.43750252 |
| H | -4.02464705 | -3.47324137 | 0.57351655  |
| C | -3.21095324 | -1.95205740 | -4.20771615 |
| H | -3.87148900 | -2.74523743 | -3.83017659 |
| C | -6.23652110 | -0.13359306 | -1.42894422 |
| H | -5.96218783 | -0.88094965 | -2.17560441 |
| H | -7.24346322 | 0.22754783  | -1.65580061 |
| H | -6.25416397 | -0.61702946 | -0.45294747 |
| C | -5.88825743 | -3.90656857 | -0.40133137 |
| H | -6.39090856 | -3.04439010 | 0.04084081  |
| H | -6.12666279 | -4.78801415 | 0.20096357  |
| H | -6.27956215 | -4.05890765 | -1.41132644 |
| C | -0.90305949 | 2.74405415  | -2.64136759 |
| H | -0.06216612 | 2.40739709  | -2.02443995 |
| C | -0.63855414 | 4.17431879  | -3.08902145 |
| H | -1.47907942 | 4.54947507  | -3.67969470 |
| H | 0.26560548  | 4.21841252  | -3.70246118 |
| H | -0.50368193 | 4.82587005  | -2.22284930 |
| C | -3.81160592 | 4.58198926  | -0.03976205 |
| H | -3.50292031 | 4.71464550  | -1.08580223 |
| C | -5.10206448 | 1.68701031  | -2.79384783 |
| H | -4.43993954 | 2.55154116  | -2.73586251 |
| H | -6.07321742 | 2.01056440  | -3.17926848 |
| H | -4.65978199 | 0.97553990  | -3.49234061 |

|    |             |             |             |
|----|-------------|-------------|-------------|
| C  | -7.70139596 | 2.05488735  | 1.60206783  |
| H  | -8.51201513 | 2.27237664  | 2.30329603  |
| H  | -8.15271002 | 1.95619443  | 0.60807602  |
| H  | -7.04173488 | 2.92330741  | 1.57406254  |
| C  | -2.87105120 | 5.37210789  | 0.86467118  |
| H  | -3.14834392 | 5.23200766  | 1.91286624  |
| H  | -2.91167055 | 6.43978179  | 0.62980107  |
| H  | -1.84585135 | 5.01974530  | 0.73540712  |
| C  | -1.09877706 | 1.76733316  | -3.79321008 |
| H  | -1.41009273 | 0.79439845  | -3.41609967 |
| H  | -0.16040338 | 1.64861502  | -4.34050349 |
| H  | -1.87240835 | 2.12906192  | -4.47699744 |
| C  | -3.60315539 | -4.85302625 | -1.02988251 |
| H  | -3.94666247 | -5.06771028 | -2.04636014 |
| H  | -3.73569702 | -5.75258824 | -0.42138828 |
| H  | -2.54070846 | -4.60701869 | -1.06733018 |
| C  | -5.27440019 | 4.97085002  | 0.12534306  |
| H  | -5.91090045 | 4.35490858  | -0.51438589 |
| H  | -5.42863466 | 6.01971808  | -0.14327651 |
| H  | -5.58854134 | 4.83201008  | 1.16329823  |
| C  | -3.88300565 | -1.22300046 | -5.36448811 |
| H  | -4.85565525 | -0.82878178 | -5.06208521 |
| H  | -4.03542214 | -1.90050906 | -6.20940537 |
| H  | -3.26045660 | -0.38799577 | -5.69610910 |
| C  | -1.85778588 | -2.54975356 | -4.58077024 |
| H  | -1.18067662 | -1.76462533 | -4.92769600 |
| H  | -1.96887260 | -3.29225471 | -5.37634189 |
| H  | -1.40656788 | -3.02972435 | -3.71118545 |
| Ti | 3.01497309  | 1.13000135  | 1.35153335  |
| Ti | 2.56080501  | -1.89720352 | 0.31502934  |
| S  | 3.10693046  | 0.47374978  | -1.99598537 |
| O  | 1.55159180  | -0.20118410 | 0.92480721  |
| O  | -0.76850280 | 2.43639522  | 0.48878635  |
| O  | 1.31368609  | 2.28907949  | 1.23024229  |
| O  | 3.96167358  | -0.59634345 | 0.94921325  |
| O  | 2.86671702  | 1.41711756  | -0.85075172 |
| O  | 2.69809889  | -0.92540379 | -1.61005517 |
| O  | 2.06901693  | -2.74389193 | 1.81079282  |
| O  | 3.01817850  | 1.03095421  | 3.13919059  |
| O  | 4.11629672  | 2.52758025  | 1.22622768  |
| O  | 3.66430420  | -3.19732219 | -0.26139849 |
| O  | 2.46724447  | 0.95087922  | -3.22774244 |
| C  | 0.24953269  | 1.76741621  | 0.79942915  |
| C  | 4.87449791  | 0.42296504  | -2.23707047 |



|   |             |             |             |
|---|-------------|-------------|-------------|
| C | 5.56085081  | -0.75240882 | -1.93499662 |
| H | 4.99172824  | -1.62588378 | -1.64076826 |
| C | 0.25469948  | 0.23944313  | 0.68690554  |
| H | -0.41878134 | -0.13101821 | 1.46466182  |
| C | 5.54431270  | 1.58803605  | -2.66262155 |
| N | 4.87831259  | 2.76324892  | -2.97263302 |
| H | 5.41889912  | 3.43603927  | -3.49390786 |
| H | 3.93484338  | 2.66103324  | -3.32213560 |
| C | 6.95045995  | -0.80513321 | -1.98747776 |
| C | 6.94801854  | 1.52361748  | -2.70012456 |
| H | 7.50484265  | 2.40498096  | -3.00619731 |
| C | 7.62620887  | 0.36170895  | -2.36549738 |
| H | 8.71205794  | 0.35937796  | -2.40746123 |
| C | 5.26494825  | -1.03560251 | 1.42732748  |
| H | 5.59724196  | -1.77913942 | 0.69878934  |
| C | 4.38190156  | 3.68376939  | 0.43760732  |
| H | 4.02439254  | 3.47342970  | -0.57340191 |
| C | 3.21099812  | 1.95195345  | 4.20774637  |
| H | 3.87139545  | 2.74523140  | 3.83017414  |
| C | 6.23653793  | 0.13371529  | 1.42872824  |
| H | 5.96225472  | 0.88101499  | 2.17546123  |
| H | 7.24352852  | -0.22738295 | 1.65543907  |
| H | 6.25403454  | 0.61720675  | 0.45275659  |
| C | 5.88804703  | 3.90680471  | 0.40134090  |
| H | 6.39071896  | 3.04467474  | -0.04090055 |
| H | 6.12635423  | 4.78828896  | -0.20093601 |
| H | 6.27941219  | 4.05912727  | 1.41131506  |
| C | 0.90319354  | -2.74413979 | 2.64140935  |
| H | 0.06226565  | -2.40740600 | 2.02456286  |
| C | 0.63869616  | -4.17446221 | 3.08889442  |
| H | 1.47925931  | -4.54970945 | 3.67945749  |
| H | -0.26542080 | -4.21862459 | 3.70239165  |
| H | 0.50375474  | -4.82589205 | 2.22264259  |
| C | 3.81157825  | -4.58197315 | 0.03952866  |
| H | 3.50300241  | -4.71471288 | 1.08559364  |
| C | 5.10222910  | -1.68691894 | 2.79371054  |
| H | 4.44012378  | -2.55146947 | 2.73578039  |
| H | 6.07341280  | -2.01044244 | 3.17908015  |
| H | 4.65997211  | -0.97544664 | 3.49221545  |
| C | 7.70126605  | -2.05499236 | -1.60209076 |
| H | 8.51306856  | -2.27149678 | -2.30224414 |
| H | 8.15097744  | -1.95701479 | -0.60729691 |
| H | 7.04193083  | -2.92371786 | -1.57587739 |
| C | 2.87092676  | -5.37202746 | -0.86486330 |

|   |            |             |             |
|---|------------|-------------|-------------|
| H | 3.14811670 | -5.23185681 | -1.91307647 |
| H | 2.91156561 | -6.43971754 | -0.63006998 |
| H | 1.84574280 | -5.01966593 | -0.73547688 |
| C | 1.09895805 | -1.76755272 | 3.79335696  |
| H | 1.41016607 | -0.79454551 | 3.41632232  |
| H | 0.16064570 | -1.64896811 | 4.34078190  |
| H | 1.87269776 | -2.12931248 | 4.47700846  |
| C | 3.60293056 | 4.85306059  | 1.03014378  |
| H | 3.94649197 | 5.06767473  | 2.04661859  |
| H | 3.73538255 | 5.75268429  | 0.42172152  |
| H | 2.54050104 | 4.60698814  | 1.06763616  |
| C | 5.27435433 | -4.97083054 | -0.12575363 |
| H | 5.91092802 | -4.35489196 | 0.51390408  |
| H | 5.42862154 | -6.01970157 | 0.14283667  |
| H | 5.58837877 | -4.83197445 | -1.16374232 |
| C | 3.88327525 | 1.22290555  | 5.36439275  |
| H | 4.85596833 | 0.82888299  | 5.06187323  |
| H | 4.03564245 | 1.90036019  | 6.20936171  |
| H | 3.26089704 | 0.38776221  | 5.69598591  |
| C | 1.85779949 | 2.54946116  | 4.58098632  |
| H | 1.18082952 | 1.76423418  | 4.92795798  |
| H | 1.96888214 | 3.29194703  | 5.37657272  |
| H | 1.40642407 | 3.02941114  | 3.71147031  |

**Table S2** Bond lengths(Å) for complex **1**.

| Bond                  | Distance(Å) | Bond      | Distance(Å) | Bond      | Distance(Å) |
|-----------------------|-------------|-----------|-------------|-----------|-------------|
| Ti1 - Ti2             | 3.2194(14)  | S1 - O6   | 1.460(4)    | C2 - C6   | 1.366(7)    |
| Ti1 - O2              | 2.003(3)    | S1 - O8   | 1.437(4)    | C3 - C7   | 1.395(8)    |
| Ti1 - O3 <sup>1</sup> | 2.068(3)    | S1 - C2   | 1.753(5)    | C4 - C41  | 1.484(10)   |
| Ti1 - O4              | 2.218(4)    | O1 - C1   | 1.248(6)    | C5 - C7   | 1.330(9)    |
| Ti1 - O5              | 1.997(4)    | O2 - C4   | 1.402(5)    | C5 - C8   | 1.367(9)    |
| Ti1 - O7              | 1.777(4)    | O3 - C1   | 1.260(6)    | C6 - C8   | 1.384(8)    |
| Ti1 - O10             | 1.758(4)    | O5 - C9   | 1.438(7)    | C9 - C10  | 1.420(11)   |
| Ti2 - O1              | 2.068(3)    | O7 - C11  | 1.415(8)    | C9 - C23  | 1.426(8)    |
| Ti2 - O2              | 2.022(3)    | O9 - C13  | 1.349(10)   | C11 - C14 | 1.450(13)   |
| Ti2 - O5              | 2.020(4)    | O10 - C17 | 1.340(12)   | C11 - C20 | 1.396(14)   |
| Ti2 - O6              | 2.187(4)    | O11 - C12 | 1.441(11)   | C12 - C15 | 1.387(15)   |
| Ti2 - O9              | 1.763(4)    | N1 - C3   | 1.358(7)    | C12 - C19 | 1.443(14)   |
| Ti2 - O11             | 1.767(4)    | C1 - C4   | 1.559(7)    | C13 - C16 | 1.366(15)   |
| S1 - O4               | 1.468(4)    | C2 - C3   | 1.396(7)    | C13 - C18 | 1.451(16)   |

**Table S3** Bond angles (°) for complex **1**.

| Bond                     | Angles (°) | Bond                   | Angles (°) | Bond                   | Angles (°) |
|--------------------------|------------|------------------------|------------|------------------------|------------|
| O2-Ti1-Ti2               | 37.08(9)   | O9-Ti2-Ti1             | 143.42(15) | O1-C1-O3               | 123.9(4)   |
| O2-Ti1-O3 <sup>1</sup>   | 83.24(13)  | O9-Ti2-O1              | 98.43(18)  | O1-C1-C4               | 113.6(4)   |
| O2-Ti1-O4                | 80.95(14)  | O9-Ti2-O2              | 168.44(18) | O3-C1-C4               | 122.4(4)   |
| O3 <sup>1</sup> -Ti1-Ti2 | 119.54(10) | O9-Ti2-O5              | 109.24(18) | C3-C2-S1               | 120.2(4)   |
| O3 <sup>1</sup> -Ti1-O4  | 83.80(13)  | O9-Ti2-O6              | 84.32(17)  | C6-C2-S1               | 119.2(4)   |
| O4-Ti1-Ti2               | 79.06(10)  | O9-Ti2-O11             | 97.7(2)    | C6-C2-C3               | 120.6(5)   |
| O5-Ti1-Ti2               | 36.98(10)  | O11-Ti2-Ti1            | 99.77(16)  | N1-C3-C2               | 122.8(5)   |
| O5-Ti1-O2                | 73.88(13)  | O11-Ti2-O1             | 93.81(17)  | N1-C3-C7               | 120.4(5)   |
| O5-Ti1-O3 <sup>1</sup>   | 156.15(15) | O11-Ti2-O2             | 93.13(18)  | C7-C3-C2               | 116.7(5)   |
| O5-Ti1-O4                | 85.98(14)  | O11-Ti2-O5             | 98.20(19)  | O2-C4-C1               | 109.5(4)   |
| O7-Ti1-Ti2               | 102.47(15) | O11-Ti2-O6             | 177.28(18) | O2-C4-C4 <sup>1</sup>  | 110.7(5)   |
| O7-Ti1-O2                | 96.94(18)  | O4-S1-C2               | 105.3(2)   | C4 <sup>1</sup> -C4-C1 | 109.5(5)   |
| O7-Ti1-O3 <sup>1</sup>   | 90.73(16)  | O6-S1-O4               | 110.8(2)   | C7-C5-C8               | 121.3(6)   |
| O7-Ti1-O4                | 174.32(17) | O6-S1-C2               | 107.4(2)   | C2-C6-C8               | 120.7(6)   |
| O7-Ti1-O5                | 98.53(17)  | O8-S1-O4               | 114.3(2)   | C5-C7-C3               | 122.2(6)   |
| O10-Ti1-Ti2              | 137.54(14) | O8-S1-O6               | 111.1(3)   | C5-C8-C6               | 118.5(6)   |
| O10-Ti1-O2               | 164.48(19) | O8-S1-C2               | 107.4(2)   | C10-C9-O5              | 113.6(6)   |
| O10-Ti1-O3 <sup>1</sup>  | 96.40(18)  | C1-O1-Ti2              | 120.9(3)   | C10-C9-C23             | 133.5(8)   |
| O10-Ti1-O4               | 83.59(19)  | Ti1-O2-Ti2             | 106.25(13) | C23-C9-O5              | 112.4(7)   |
| O10-Ti1-O5               | 103.81(18) | C4-O2-Ti1              | 135.4(3)   | O7-C11-C14             | 111.0(8)   |
| O10-Ti1-O7               | 98.6(2)    | C4-O2-Ti2              | 118.0(3)   | C20-C11-O7             | 111.7(9)   |
| O1-Ti2-Ti1               | 112.11(10) | C1-O3-Ti1 <sup>1</sup> | 130.8(3)   | C20-C11-C14            | 117.3(10)  |
| O1-Ti2-O6                | 84.08(14)  | S1-O4-Ti1              | 133.1(2)   | O11-C12-C19            | 113.5(10)  |
| O2-Ti2-Ti1               | 36.67(9)   | Ti1-O5-Ti2             | 106.55(15) | C15-C12-O11            | 114.2(11)  |
| O2-Ti2-O1                | 76.73(13)  | C9-O5-Ti1              | 128.0(5)   | C15-C12-C19            | 118.8(13)  |
| O2-Ti2-O6                | 84.73(13)  | C9-O5-Ti2              | 125.4(5)   | O9-C13-C16             | 121.0(11)  |
| O5-Ti2-Ti1               | 36.48(10)  | S1-O6-Ti2              | 132.2(2)   | O9-C13-C18             | 115.7(11)  |
| O5-Ti2-O1                | 147.88(14) | C11-O7-Ti1             | 140.5(5)   | C16-C13-C18            | 119.9(12)  |
| O5-Ti2-O2                | 72.97(13)  | C13-O9-Ti2             | 159.1(7)   | O10-C17-C21            | 120.0(12)  |
| O5-Ti2-O6                | 82.79(15)  | C17-O10-Ti1            | 164.5(7)   | O10-C17-C22            | 114.5(11)  |
| O6-Ti2-Ti1               | 79.50(9)   | C12-O11-Ti2            | 142.2(6)   | C21-C17-C22            | 124.5(13)  |

**Table S4** Bond lengths(Å) for complex **2**.

| Bond      | Distance(Å) | Bond     | Distance(Å) | Bond     | Distance(Å) |
|-----------|-------------|----------|-------------|----------|-------------|
| Ti1 - Ti2 | 3.2323(13)  | O2 - C1  | 1.250(5)    | C2 - C5  | 1.398(7)    |
| Ti1 - O1  | 2.008(3)    | O3 - C1  | 1.251(6)    | C3 - C6  | 1.384(7)    |
| Ti1 - O3  | 2.073(3)    | O4 - C9  | 1.459(6)    | C4 - C41 | 1.520(9)    |
| Ti1 - O4  | 2.005(3)    | O7 - C14 | 1.432(8)    | C5 - N1  | 1.361(6)    |
| Ti1 - O5  | 2.223(3)    | O8 - C11 | 1.436(6)    | C5 - C7  | 1.404(8)    |
| Ti1 - O8  | 1.772(3)    | O9 - C10 | 1.400(7)    | C6 - C8  | 1.371(8)    |

|           |          |           |          |           |           |
|-----------|----------|-----------|----------|-----------|-----------|
| Ti1 - O9  | 1.763(4) | O10 - C16 | 1.362(7) | C6 - C18  | 1.507(8)  |
| Ti2 - O1  | 2.031(3) | C1 - C4   | 1.562(6) | C7 - C8   | 1.355(8)  |
| Ti2 - O21 | 2.063(3) | C2 - C3   | 1.371(6) | C9 - C12  | 1.476(8)  |
| Ti2 - O4  | 1.996(3) | C2 - C5   | 1.398(7) | C9 - C17  | 1.463(8)  |
| Ti2 - O6  | 2.177(3) | C3 - C6   | 1.384(7) | C10- C13  | 1.492(8)  |
| Ti2 - O7  | 1.742(4) | C4 - C41  | 1.520(9) | C10 - C21 | 1.483(8)  |
| Ti2 - O10 | 1.785(3) | C5 - N1   | 1.361(6) | C11 - C23 | 1.483(8)  |
| S1 - O5   | 1.468(3) | C5 - C7   | 1.404(8) | C11 - C24 | 1.478(9)  |
| S1 - O6   | 1.465(3) | O9 - C10  | 1.400(7) | C14 - C15 | 1.504(8)  |
| S1 - O11  | 1.432(3) | O10 - C16 | 1.362(7) | C14-C20   | 1.427(9)  |
| S1 - C2   | 1.753(5) | C1 - C4   | 1.562(6) | C16-C19   | 1.474(9)  |
| O1 - C4   | 1.404(5) | C2 - C3   | 1.371(6) | C16-C22   | 1.468(10) |

**Table S5** Bond angles ( ° ) for complex **2**.

| Bond                     | Angles ( ° ) | Bond                    | Angles ( ° ) | Bond                   | Angles ( ° ) |
|--------------------------|--------------|-------------------------|--------------|------------------------|--------------|
| O1-Ti1-Ti2               | 37.09(8)     | O7-Ti2-O1               | 98.06(15)    | O3-C1-C4               | 114.1(4)     |
| O1-Ti1-O3                | 76.78(13)    | O7-Ti2-O2 <sup>1</sup>  | 89.12(15)    | C3-C2-S1               | 118.6(4)     |
| O1-Ti1-O5                | 85.80(12)    | O7-Ti2-O4               | 97.89(15)    | C3-C2-C5               | 120.8(5)     |
| O3-Ti1-Ti2               | 111.58(10)   | O7-Ti2-O6               | 173.42(15)   | C5-C2-S1               | 120.6(4)     |
| O3-Ti1-O5                | 81.63(12)    | O7-Ti2-O10              | 98.07(17)    | C2-C3-C6               | 122.6(6)     |
| O4-Ti1-Ti2               | 36.01(9)     | O10-Ti2-Ti1             | 134.68(13)   | O1-C4-C1               | 108.8(4)     |
| O4-Ti1-O1                | 72.67(12)    | O10-Ti2-O1              | 163.59(15)   | O1-C4-C4 <sup>1</sup>  | 110.6(5)     |
| O4-Ti1-O3                | 146.74(14)   | O10-Ti2-O2 <sup>1</sup> | 99.76(15)    | C4 <sup>1</sup> -C4-C1 | 109.0(5)     |
| O4-Ti1-O5                | 83.31(13)    | O10-Ti2-O4              | 102.41(15)   | C2-C5-C7               | 115.9(6)     |
| O5-Ti1-Ti2               | 78.95(8)     | O10-Ti2-O6              | 83.22(15)    | N1-C5-C2               | 123.0(5)     |
| O8-Ti1-Ti2               | 103.64(11)   | O5-S1-C2                | 107.1(2)     | N1-C5-C7               | 121.0(6)     |
| O8-Ti1-O1                | 93.74(14)    | O6-S1-O5                | 110.77(19)   | C3-C6-C18              | 121.1(7)     |
| O8-Ti1-O3                | 93.44(14)    | O6-S1-C2                | 105.1(2)     | C8-C6-C3               | 116.2(6)     |
| O8-Ti1-O4                | 101.30(14)   | O11-S1-O5               | 112.3(2)     | C8-C6-C18              | 122.6(6)     |
| O8-Ti1-O5                | 175.02(14)   | O11-S1-O6               | 113.1(2)     | C8-C7-C5               | 121.7(6)     |
| O9-Ti1-Ti2               | 140.95(11)   | O1-S1-C2                | 107.9(2)     | C7-C8-C6               | 122.7(6)     |
| O9-Ti1-O1                | 168.46(15)   | Ti1-O1-Ti2              | 106.32(14)   | O4-C9-C12              | 111.3(5)     |
| O9-Ti1-O3                | 99.41(15)    | C4-O1-Ti1               | 118.7(3)     | O4-C9-C17              | 111.5(5)     |
| O9-Ti1-O4                | 107.92(15)   | C4-O1-Ti2               | 134.1(3)     | C17-C9-C12             | 118.0(6)     |
| O9-Ti1-O5                | 82.85(14)    | C1-O2-Ti2 <sup>1</sup>  | 131.8(3)     | O9-C10-C13             | 109.8(5)     |
| O9-Ti1-O8                | 97.38(16)    | C1-O3-Ti1               | 120.1(3)     | O9-C10-C21             | 109.2(6)     |
| O1-Ti2-Ti1               | 36.59(9)     | Ti2-O4-Ti1              | 107.78(15)   | C21-C10-C13            | 113.2(6)     |
| O1-Ti2-O2 <sup>1</sup>   | 83.46(12)    | C9-O4-Ti1               | 128.6(3)     | O8-C11-C23             | 109.9(5)     |
| O1-Ti2-O6                | 81.09(12)    | C9-O4-Ti2               | 123.0(3)     | O8-C11-C24             | 109.3(5)     |
| O2 <sup>1</sup> -Ti2-Ti1 | 119.32(9)    | S1-O5-Ti1               | 131.8(2)     | C24-C11-C23            | 113.0(7)     |
| O2 <sup>1</sup> -Ti2-O6  | 84.30(13)    | S1-O6-Ti2               | 135.62(19)   | O7-C14-C15             | 109.2(7)     |
| O4-Ti2-Ti1               | 36.20(9)     | C14-O7-Ti2              | 147.5(4)     | C20-C14-O7             | 113.9(6)     |
| O4-Ti2-O1                | 72.36(12)    | C11-O8-Ti1              | 141.5(4)     | C20-C14-C15            | 115.8(7)     |

|                        |            |             |          |             |          |
|------------------------|------------|-------------|----------|-------------|----------|
| O4-Ti2-O2 <sup>1</sup> | 155.51(13) | C10-O9-Ti1  | 157.9(4) | O10-C16-C19 | 112.5(6) |
| O4-Ti2-O6              | 88.10(13)  | C16-O10-Ti2 | 143.4(4) | O10-C16-C22 | 113.1(7) |
| O6-Ti2-Ti1             | 79.10(8)   | O2-C1-O3    | 124.5(4) | C22-C16-C19 | 112.4(6) |
| O7-Ti2-Ti1             | 104.14(12) | O2-C1-C4    | 121.4(5) |             |          |

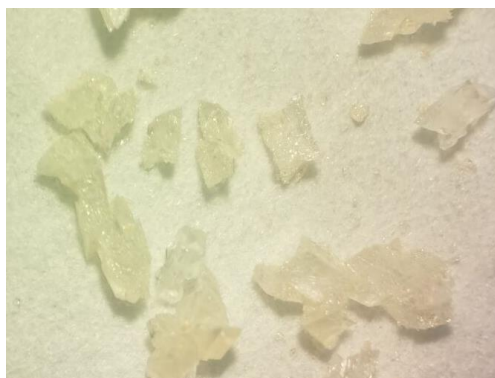

(a)

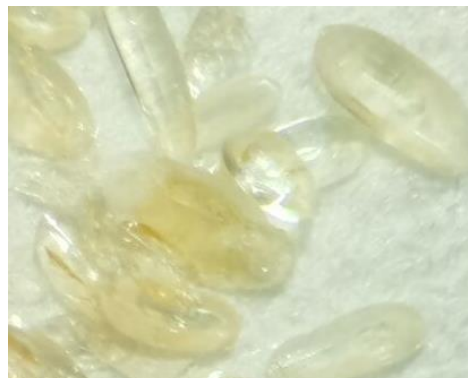

(b)

**Figure S1** Photos of the crystals **1** (a) and **2** (b).

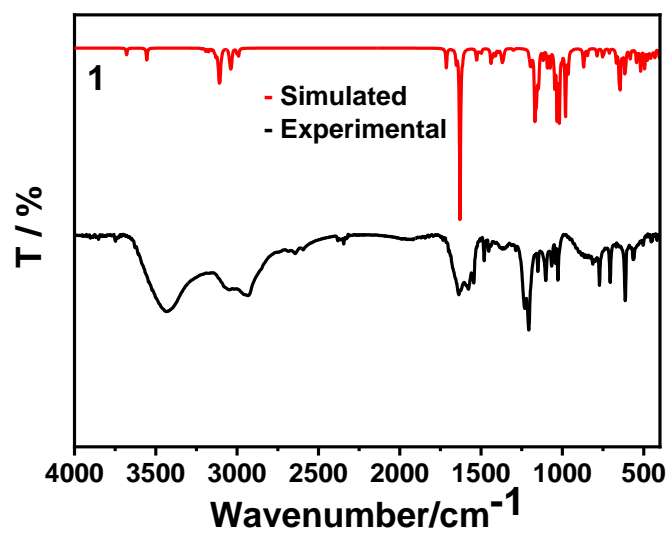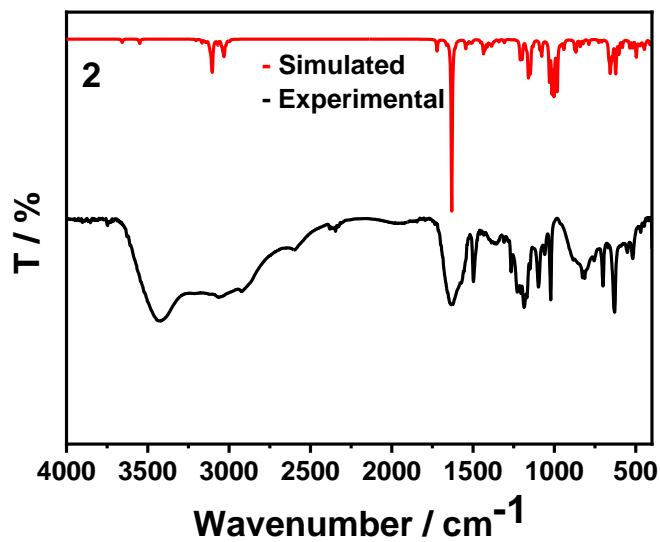

**Figure S2** Comparison of Experimental and Computed (DFT/B3LYP method with 6-311G\* and lanl2dz basis set) FT-IR spectra of **1** and **2**.

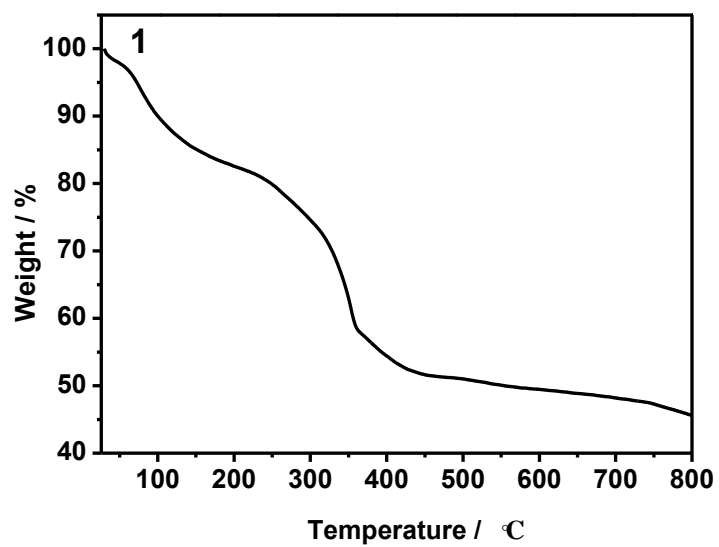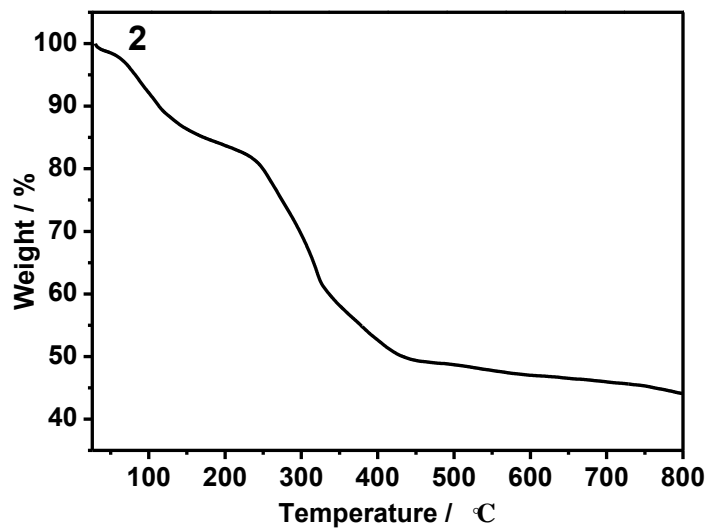

**Figure S3** TGA curves of **1** and **2**. All the two samples were treated by vacuum drying.

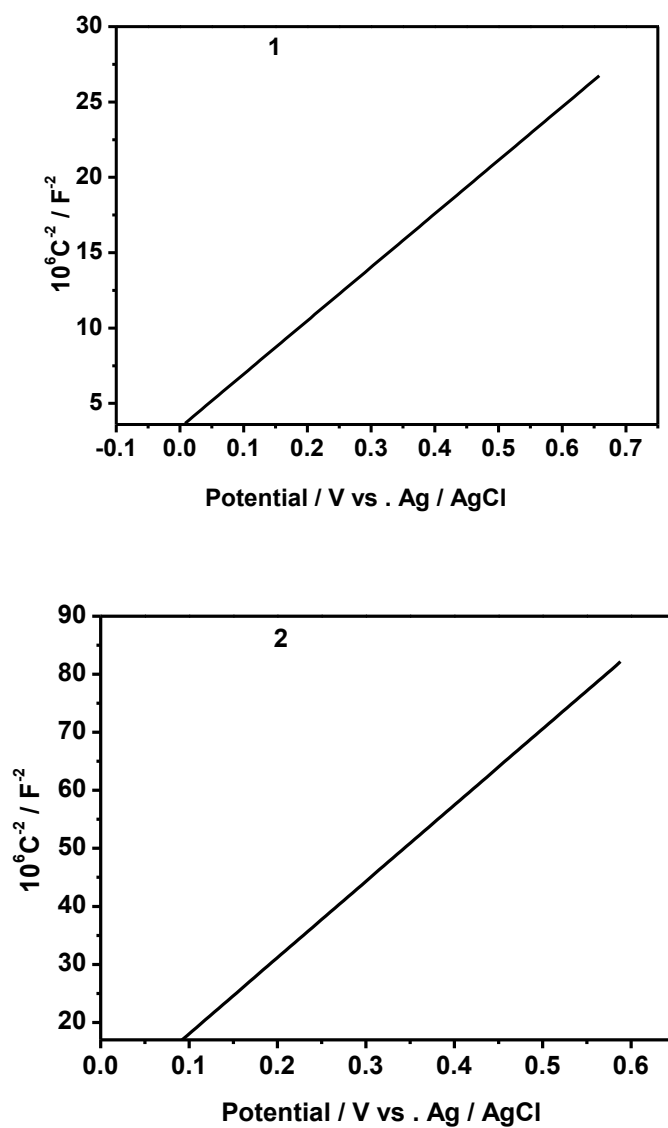

**Figure S4** Mott-Schottky plots for **1** and **2** in 0.1 M  $\text{Na}_2\text{SO}_4$  aqueous solution.



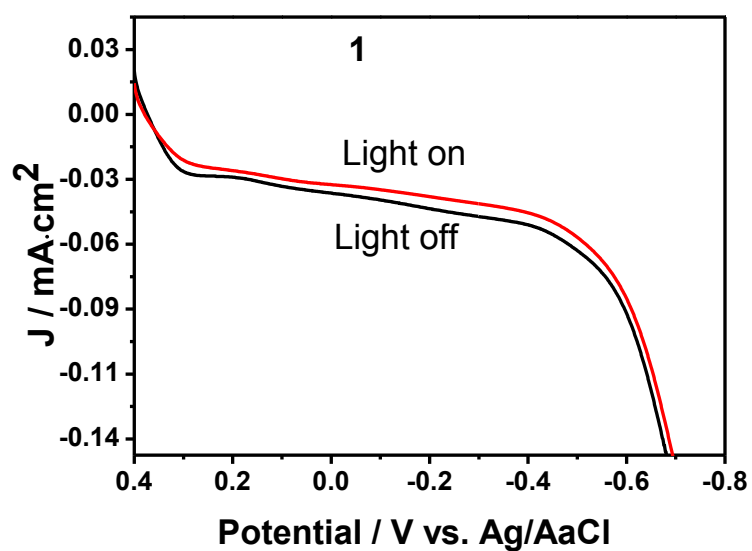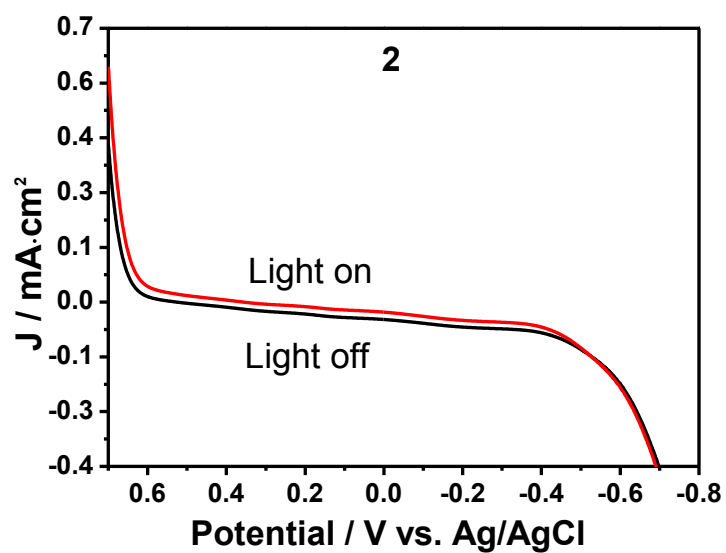

**Figure S5** Full range J-V curves of **1** and **2** in light-off (black) and light-on (red) conditions.

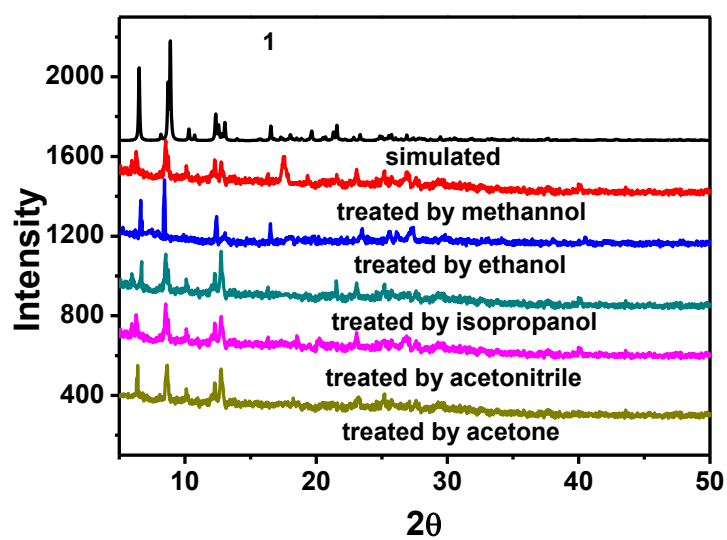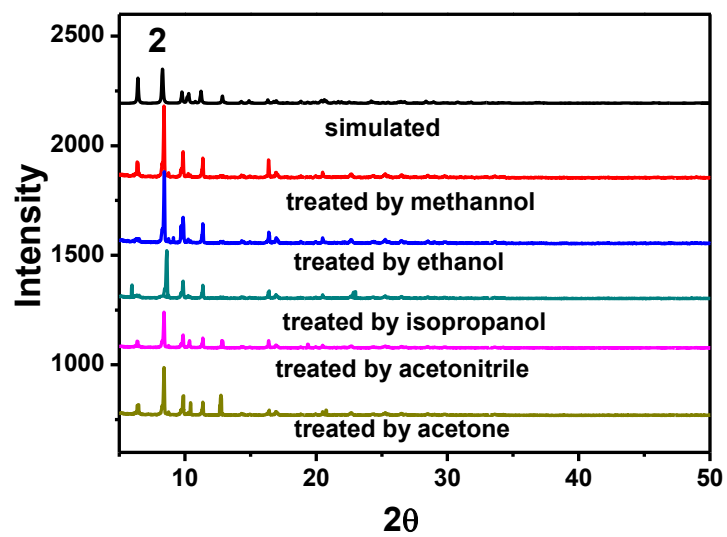

**Figure S6** XRD patterns of **1** and **2** under solvothermal treatment at room temperature for 24 h in different organic solvents.

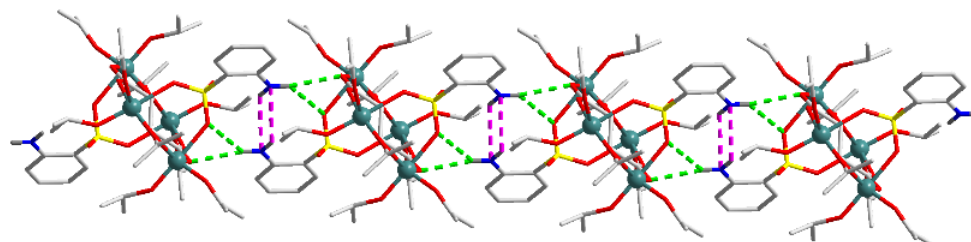

(a)

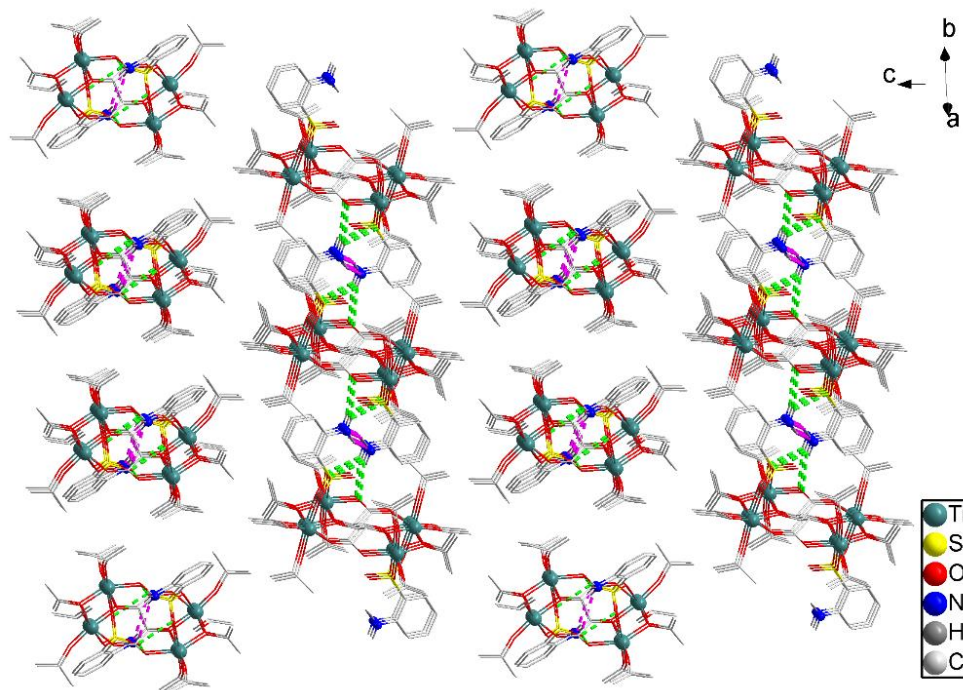

(b)

**Figure S7** (a) The hydrogen bonds between adjacent TOCs of **1**; (b) The 3D supramolecular network of **1**. The most hydrogen atoms are omitted for clarity.

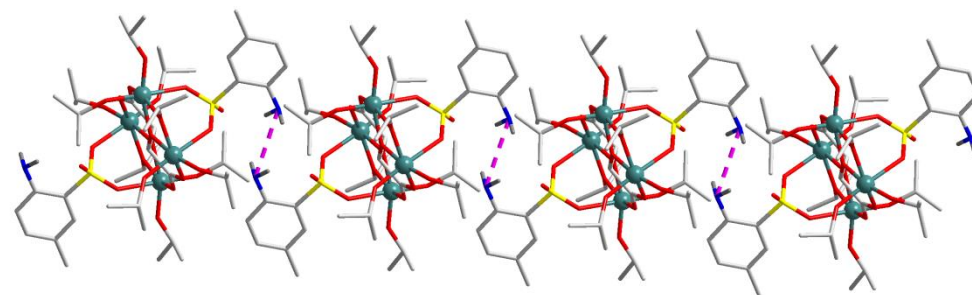

(a)

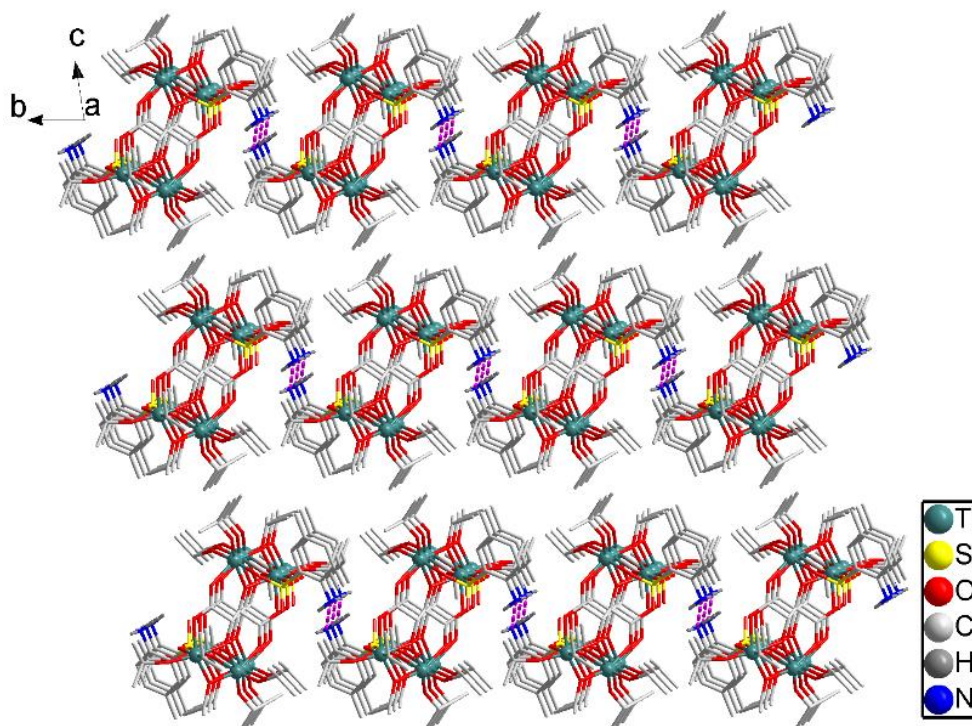

(b)

**Figure S8** (a) The hydrogen bonds between adjacent TOCs of **2**; (b) The 3D supramolecular network of **2** viewing along *a*-axis. The most hydrogen atoms are omitted for clarity.
